# Supplementary material
Source: PubMed Central journal article supplement (PMC6844505)

**Intestinal epithelial HMGB1 inhibits bacterial infection via STAT3 regulation of autophagy**

Yong-guo Zhang<sup>1</sup>, Xiaorong Zhu<sup>2</sup>, Rong Lu<sup>1</sup>, Jeannette S. Messer<sup>2</sup>, Yinglin Xia<sup>1</sup>, Eugene B Chang<sup>2</sup>, and Jun Sun<sup>1</sup>

<sup>1</sup> Department of Medicine, University of Illinois at Chicago, Chicago, IL, USA

<sup>2</sup> Department of Medicine, Knapp Center for Biomedical Discovery, University of Chicago, Chicago, IL, USA

Address correspondence to:

Jun Sun, PhD, AGAF, Associate Professor

Division of Gastroenterology and Hepatology, Department of Medicine

University of Illinois at Chicago, 840 S Wood Street, Room 704 CSB

Chicago, IL, 60612, USA

Tel: 312-996-5020 E-mail: junsun7@uic.edu

Eugene B Chang, M.D., Professor and Director

Department of Medicine, Knapp Center for Biomedical Discovery, University of Chicago, Chicago, IL, 60637, USA

Tel: 773 702 6458 E-mail: echang@medicine.bsd.uchicago.edu

### Supplementary Figure Legends:

**Figure S1.** NF $\kappa$ B, MAPK/JNK, and TLR signaling pathways in the intestine of *Hmgb1* <sup>$\Delta$ IEC</sup> mice compared with the *Hmgb1*<sup>loxP/loxP</sup> mice. (A) Western blot analysis of NF $\kappa$ B and MAPK/JNK expression in intestinal epithelial cells of *Hmgb1*<sup>loxP/loxP</sup> and *Hmgb1* <sup>$\Delta$ IEC</sup> mouse 8 h post *Salmonella* Typhimurium infection. (B) Western blot analysis of TLR in intestine of *Hmgb1*<sup>loxP/loxP</sup> and *Hmgb1* <sup>$\Delta$ IEC</sup> mouse 8 h postinfection. VIL1 is used as a marker for epithelial cells and an internal control. ACTB is also used as an internal control. (n = 3).

**Figure S2.** The absence of gene targeted-deletion of intestinal epithelial *Hmgb1* increased p-STAT3 and led to total STAT3 nuclear translocation *in vitro*. (A) Western blot analysis of p-STAT3 and STAT3 expression of *Hmgb1*<sup>+/+</sup> and *hmgb1*<sup>-/-</sup> MEF cells colonized with wild-type *Salmonella* Typhimurium. (B) Western blot analysis of p-STAT3 and STAT3 levels in cytosolic (C) and nuclear (N) extracts isolated from *Hmgb1*<sup>+/+</sup> and *hmgb1*<sup>-/-</sup> MEF cells colonized with wild-type *Salmonella* Typhimurium. The nuclear protein SP1, which is absent in the cytosol, served as a nuclear protein loading control. Cytosolic and nuclear protein density expression normalized with total protein. The red arrow marks p-STAT3. (C) The relative intensity of cytoplasmic and nuclear STAT3 from *Hmgb1*<sup>+/+</sup> and *hmgb1*<sup>-/-</sup> MEF cells colonized with wild-type *Salmonella* Typhimurium (n=3/group. student's t-test, \*p<0.05). Cytosolic and nuclear protein density expression normalized with total protein.

**Figure S3.** HMGB1 could interact with STAT3. (A) Detailed information of HMGB1 interaction with STAT3 by using PrePPI software. (B) PrePPI-predicted 3 binding domains in HMGB1. (C) PrePPI-predicted 5 binding domains in STAT3.

**Figure S4.** Nuclear STAT3 was decreased and cytosolic STAT3 was increased in *Salmonella*-infected MEF *hmgb1*<sup>-/-</sup> cells. (A) STAT3 and HMGB1 staining of *Hmgb1*<sup>+/+</sup> and *hmgb1*<sup>-/-</sup> MEF cells colonized with wild-type *Salmonella* Typhimurium. MEF cells were grown in the Lab-Tek chambered coverglass system. The MEFs were colonized with

*Salmonella* Typhimurium for 30 min, washed, and incubated in fresh DMEM medium for 30 min. Images for each protein shown represent 3 separate experiments.

## Supplemental Figure 1

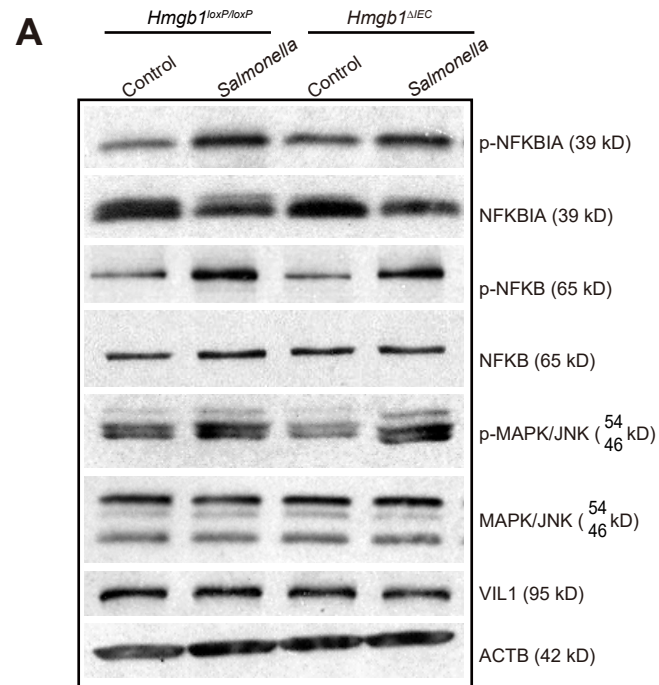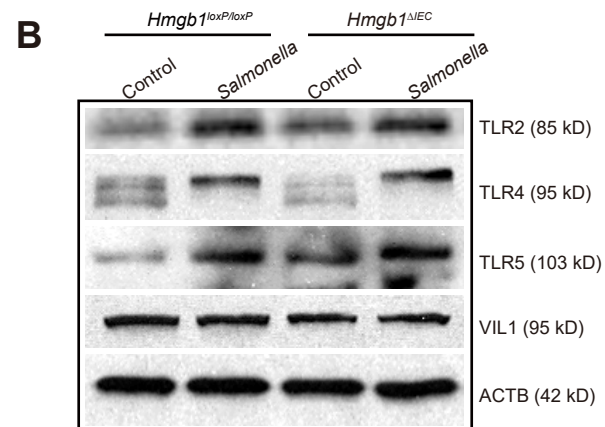

Supplemental Figure 2

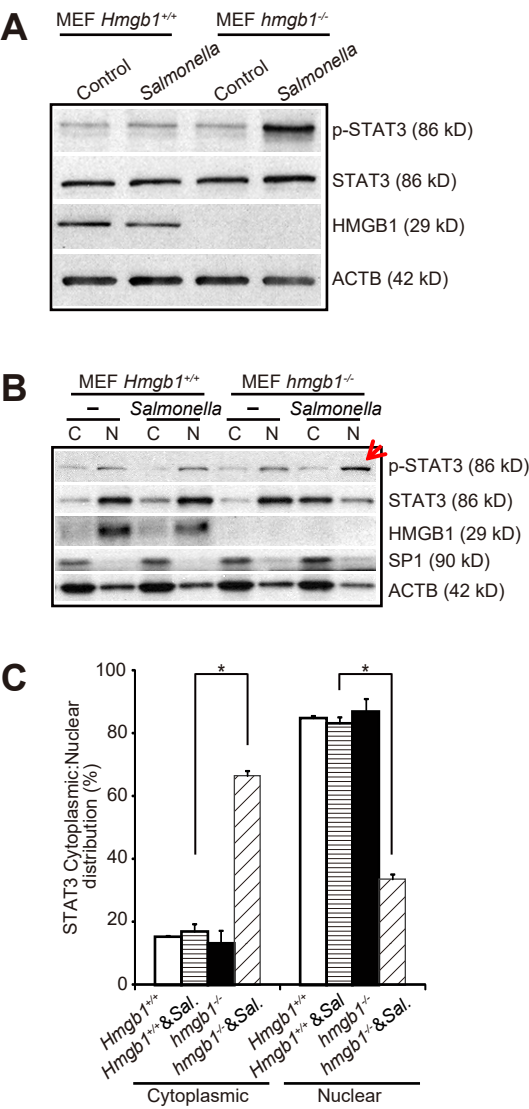

Supplemental Figure 3

A

Protein

Protein: High mobility group protein B1 (High mobility group protein 1) (HMG-1)  
Uniprot id: P09429  
Uniprot ac: HMGB1\_HUMAN  
Gene name: HMGB1  
Other name: HMG1

Interactions

Show only predictions in same cellular compartment: ☐  
Do not show predictions with possible paralogs: ☒  
Show interactions with: both experimental and/or predicted evidence  
Show interactions with: with or without structural model  
Show interactions with a probability higher than (default .5):  
Search partner:  

Reload Interactions

Download

| Interact. | Gene          | Predicted scores |      |       |      |     |     |     |     | Experimental score |     |      | Final     |      |
|-----------|---------------|------------------|------|-------|------|-----|-----|-----|-----|--------------------|-----|------|-----------|------|
|           |               | SM               | PrP  | Max_S | PR   | OR  | PP  | EP  | GO  | Pred Score         | DBs | Pubs | Exp Score | Prob |
| P40763    | STAT3<br>APRF | 23.3             | 23.3 | 23.3  | 15.9 | 0.6 | 2.4 | 1.6 | 5.9 | 5098.2             |     |      |           | 0.89 |

B Predicted binding domains in HMGB1

- 1: Positions:

13 14 15 16 17 18 20 21 22 24

Amino Acids:

M S S Y A F V Q T R
- 2: Positions:

99 100 101 102 103 104 106 107 108 109 110 111 113

Amino Acids:

P S A F F L C S E Y R P I
- 3: Positions:

122 123 125 126 128 130 131 132 133 136

Amino Acids

I G V A K G E M W T

C Predicted binding domains in STAT3

- 1: Positions:

1 3 4 6 7 9 10 11 12 13

Amino Acids:

M Q W Q L Q L D T R
- 2: Positions:

39 40 41 42 44 45 46

Amino Acids:

E S Q D A Y A
- 3: Positions:

133 134 135 136 137 138 139

Amino Acids:

T A A V V T E
- 4: Positions:

204 205 207 208 209

Amino Acids:

E Q L T A
- 5: Positions:

251 252 253 254 255 256 257

Amino Acids:

C I G G P P N

Supplemental Figure 4

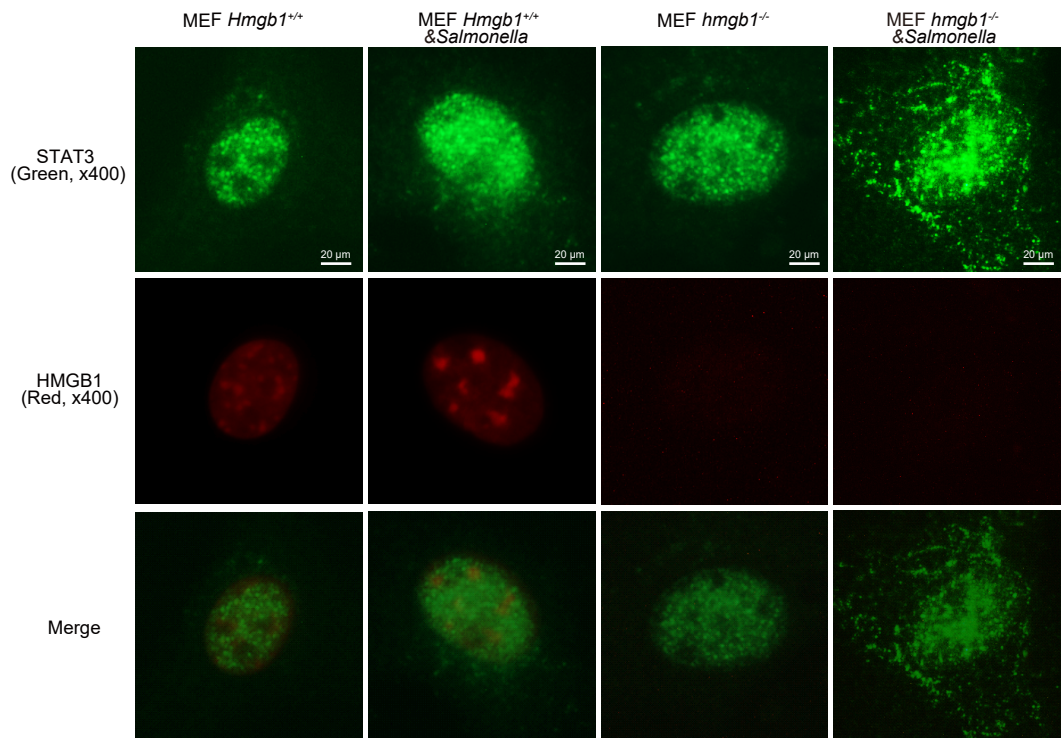

Supplement: kaup-15-11-1596485-s001.pdf [file kaup-15-11-1596485-s001.pdf]
